# Supplementary material for: Sustainability of a Mobile Phone Application-Based Data Reporting System in Myanmar’s Malaria Elimination Program: A Qualitative Study
Source: Research Square preprint supplement (doi:10.21203/rs.3.rs-701467/v1), 2021-07-15
Supplement: Supplementary file [file 0e027bd13d34f482c0e0441f.pdf]

A

Malaria Case-based Volunteer: demo

NEW CASE | Unsent Data

2/17/17 2:21 PM  
Su, 29, Pf

+

B

Malaria Case-based Volunteer: demo

NEW CASE | Patient profile

Patient name  
Enter full patient name

Patient age  
Enter patient age in years

Patient phone  
Enter phone number

Patient Residence

C

Malaria Case-based Volunteer: demo

NEW CASE | Patient sex

Male ☐

Female ☐

Pregnant female ☐

D

Malaria Case-based Volunteer: demo

NEW CASE | Symptoms

Malaria symptoms present? ☐ Yes ☐ No

Care sought within 24 hours? ☐ W/i 24h ☐ After 24h

Severe symptoms present? ☐ Yes ☐ No

E

Malaria Case-based Volunteer: demo

NEW CASE | Test result

☐ Negative ☐ Pf ☐ Pv ☐ Mixed ☐ Invalid

F

Malaria Case-based Volunteer: demo

NEW CASE | Dynamic treatment

Severe >15  
Give 4 tablet ACT and refer

ACT x 24 ☐ Yes ☐ No

Referred ☐ Yes ☐ No

G

Malaria Case-based Volunteer: demo

NEW CASE | Patient advice

Vomiting  
If you vomit within 30 minutes of taking the medication, repeat your dose.

Taking medication with food  
Within 24 hours of onset of fever or other symptoms?

Side effects  
If you have dark coloured urine, stop taking your Primaquine and go to the nearest health centre.

When to get help  
If you do not feel better within 1 day, or start to feel much worse, go to the nearest health facility for further care.

H

Malaria Case-based Volunteer: demo

NEW CASE | Follow-up questions

Travelling ☒ Yes ☐ No

Where did you travel?

LLIN / ITN usage ☐ Yes ☒ No

LLIN / ITN ownership ☐ Yes ☐ No

I

Malaria Case-based Volunteer: demo

Please check before Transmission

Name: Su  
Age: 29  
Residence: OrgUnit1  
Gender: Female  
Fever: Yes  
Care sought: W/i 24h  
Severe: Yes  
RDT test: Pf  
Treatment: No  
Referred: Yes  
Travelling: Yes  
Occupation: plantation  
LLIN/ITN usage: No  
LLIN/ITN ownership: Yes

✓ ✕

J

Malaria Case-based Volunteer: demo

PAST CASES | Sent Data

2/17/17 2:21 PM  
Su, 29, Pf

2/17/17 2:14 PM  
Su, 29, Pf

2/8/17 1:39 PM  
G, 0, Pv

2/8/17 1:26 PM  
Gd, 12, Pv

2/8/17 1:25 PM  
Ad, 27, Pv

2/8/17 1:22 PM  
D, 12, Pv

K

Malaria Case-based Volunteer: demo

STOCK CONTROL | Receipts Balances

|            | RDT  | ACT x 6 | ACT x 12 | ACT x 18 | ACT x 24 | Cq  | Pq  |
|------------|------|---------|----------|----------|----------|-----|-----|
| Balance    | 0.0  | 0.0     | 0.0      | 0.0      | 0.0      | 0.0 | 0.0 |
| Receipts   | 0.0  | 0.0     | 0.0      | 0.0      | 0.0      | 0.0 | 0.0 |
| Used Today | 2.0  | 0.0     | 0.0      | 2.6      | 0.0      | 0.0 | 0.0 |
| Available  | -2.0 | 0.0     | 0.0      | -2.6     | 0.0      | 0.0 | 0.0 |
| Status     | ✓    | ✓       | ✓        | ✓        | ✓        | ✓   | ✓   |

See Receipt New Receipt

See Balance New Balance

L

Malaria Case-based Volunteer: demo

MONITORING | Time Period

Last 6 months

| Case Stats      | Sep | Oct | Nov | Dec | Jan | Feb  |
|-----------------|-----|-----|-----|-----|-----|------|
| Total Tested    | 0   | 0   | 0   | 0   | 0   | 7    |
| Pf              | 0   | 0   | 0   | 0   | 0   | 4    |
| Pv              | 0   | 0   | 0   | 0   | 0   | 2    |
| Mixed           | 0   | 0   | 0   | 0   | 0   | 1    |
| Negative        | 0   | 0   | 0   | 0   | 0   | 0    |
| Positivity rate | 0%  | 0%  | 0%  | 0%  | 0%  | 100% |
| Referrals       | 0   | 0   | 0   | 0   | 0   | 5    |

| Consumption | Sep | Oct | Nov | Dec | Jan | Feb |
|-------------|-----|-----|-----|-----|-----|-----|
| RDT         | 0   | 0   | 0   | 0   | 0   | 5   |
| ACT x 6     | 0   | 0   | 0   | 0   | 0   | 1   |
| ACT x 12    | 0   | 0   | 0   | 0   | 0   | 0   |
| ACT x 18    | 0   | 0   | 0   | 0   | 0   | 2   |
| ACT x 24    | 0   | 0   | 0   | 0   | 0   | 0   |
| Cq          | 0   | 0   | 0   | 0   | 0   | 0   |
